# Supplementary material
Source: PubMed Central journal article supplement (PMC4990461)

**Figure S1, related to Figure 5. JAM2 function is necessary to prevent dendritic wrapping *in vitro*.** (a) 7div myelinating SCN cultures incubated for the final two days with either IgG or (b) anti-JAM2 function blocking antibody. Oligodendrocytes (asterisks) wrap myelin membranes on axons (arrowheads) and on dendrites (arrows). (c) the percentage of MBP+ myelin segments on MAP2+/NF- dendrites. Bar graphs represent means with s.e.m. error bars. Significance was calculated using one-tailed Students t-test. \*\*, P = 0.0072. Scale bar: 10 micrometers.

**Figure S2, related to Figure 5 and 6. Oligodendrocyte ensheathment of JAM2 KO neurons *in vitro* and *in vivo* clusters somatodendritic CASPR protein.** (a) a myelinating SCN coculture immunostained for MBP (red), CASPR (green) and MAP2 (white). Insets demonstrate examples of (a1) clustered CASPR on a wrapped neuron cell body, (a2) clustered CASPR on a wrapped dendrite, and (a3) no clustered CASPR signal on an unwrapped MAP2+ neuron. (b) a MAP2+ JAM2 KO dorsal horn neuron is wrapped *in vivo* by an MBP+ oligodendrocyte. At the edges of the MBP+ membrane is a spiraling line of clustered CASPR protein on the neuron surface. (c-e) a myelin-wrapped dorsal horn JAM2 KO neuron in three adjacent semi-thin sections stained with toluidine blue. The neuron cytoplasm is pseudo-colored green, and its nucleus is pseudo-colored blue. DAPI, blue. Scale bars: (a-c) 10 micrometers.

**Figure S3, related to Figure 6. JAM2 is widely expressed in spinal cord gray matter.** Low-field images of the (a) dorsal and (b) ventral horns in a heterozygous *jam2:beta-galactosidase* knock-in reporter mouse shows widespread colocalization of NeuN+ beta-galactosidase+ cells. The ventral horns of (c) *jam2* heterozygous and (d) knockout mice show the presence of JAM2 protein on large neurons in MAP2+ gray matter. DAPI, blue. Scale bars: 50 micrometers.

**Figure S4, related to Figure 6. The spinal cord dorsal horn develops normally in JAM2 KO mice.** Cross-sections of (a) JAM2 heterozygous (JAM2 Het) and (b) JAM2 KO show specific antibody labeling of JAM2 (white) on MAP2+ neuron cell bodies (arrowheads) in dorsal horn gray matter. In the dorsal horns of (c) WT and (d) JAM2 KO mice the densities of NeuN+ neurons and CC1+ oligodendrocytes is not significantly different. Quantification of (e) NeuN+ and (f) CC1+ cells in WT and JAM2 KO mouse dorsal horns. Bar graphs represent means with s.e.m. error bars. n = 3 littermate pairs. Significance was calculated using the paired two-tailed Students t-test. DAPI, blue. Scale bars: 20 micrometers.

**Figure S5, related to Figure 7. Pax2+ dorsal horn neurons have no or few somatic synapses *in vivo*.** Quantification of the number of (a) VGLUT1, VGLUT2 or VGAT synapses onto PAX2+ neuronal somata in *Jam2* <sup>-/-</sup> or *Jam2* <sup>+/-</sup> mice. (b) VGAT puncta on a Pax2+ neuron soma. (c) a Pax2+ neuron wrapped by MBP+ membrane has no VGLUT1+ synaptic puncta on its soma. Bar graphs represent mean with s.e.m. error bars. n = 4 littermate pairs. Significance was calculated using the two-tailed Mann-Whitney U test. Scale bars: (b-c) 10 micrometers.

Figure S1

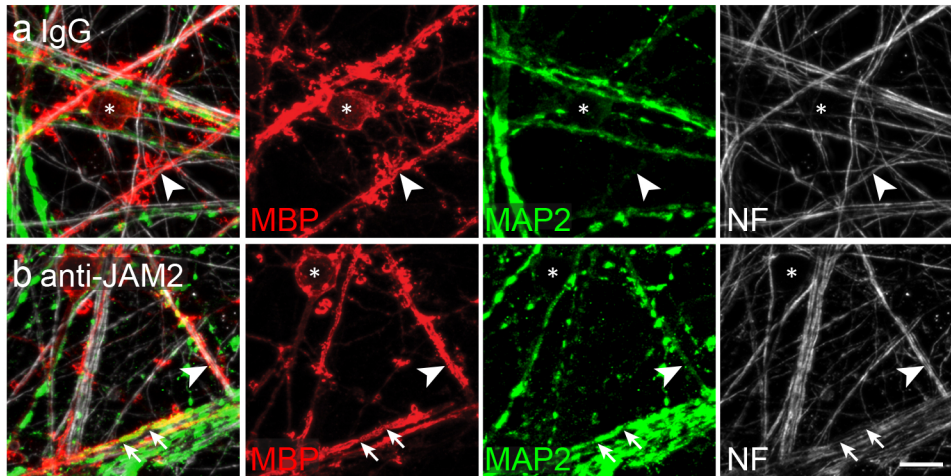

**c**

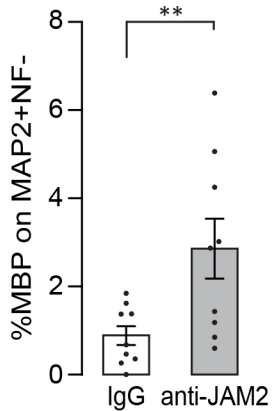

Figure S2

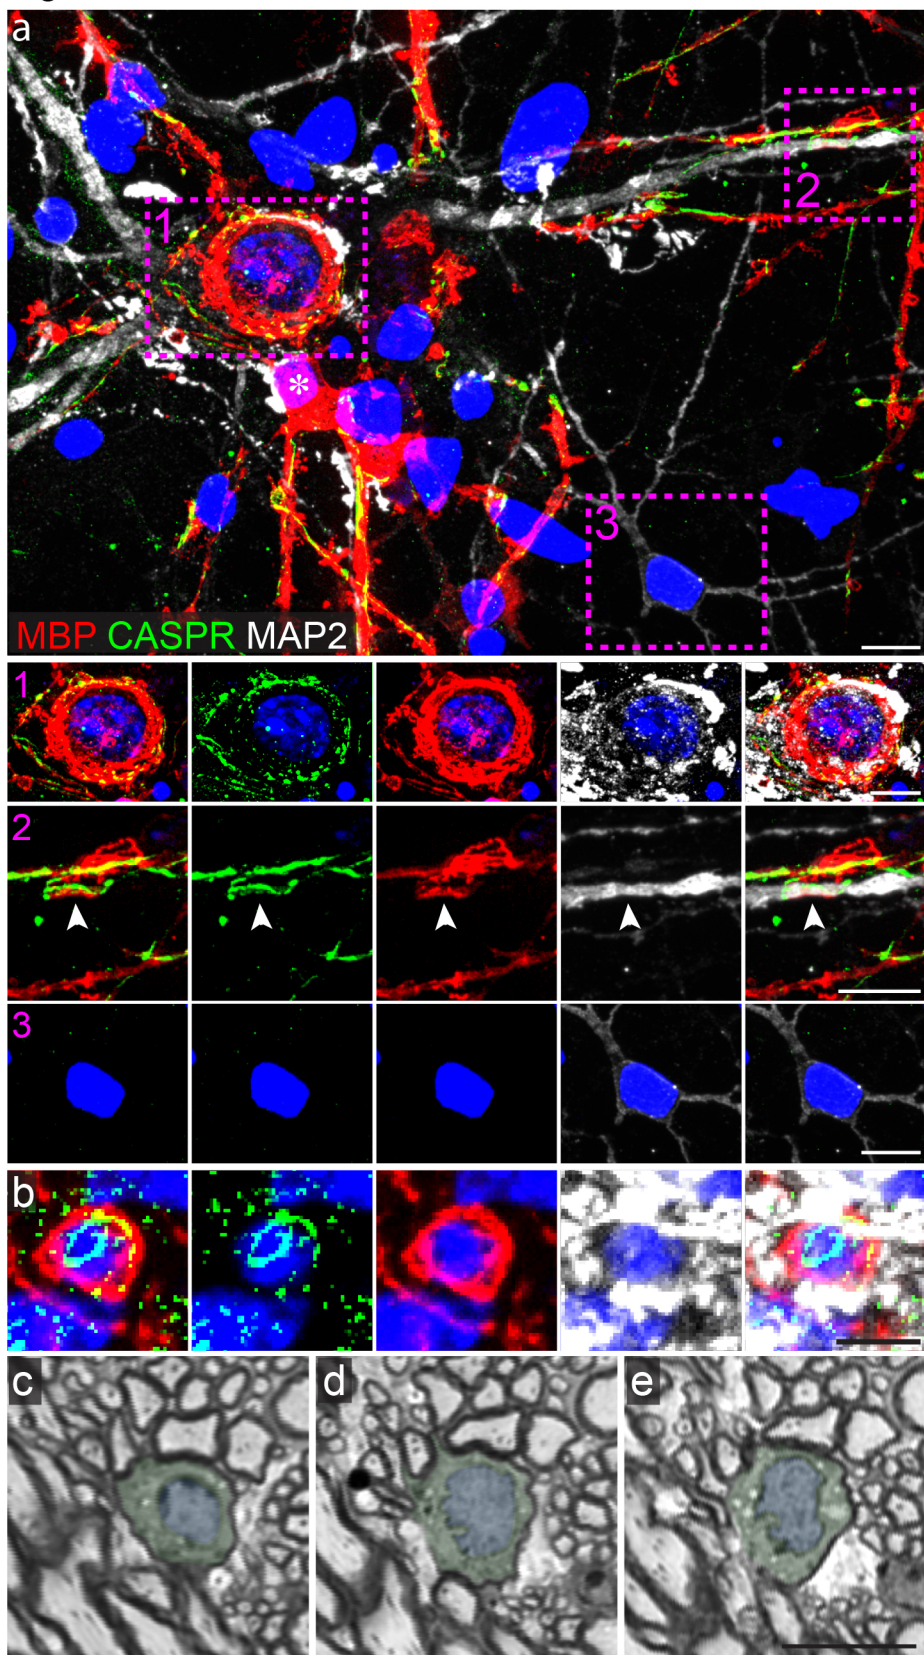



Figure S3

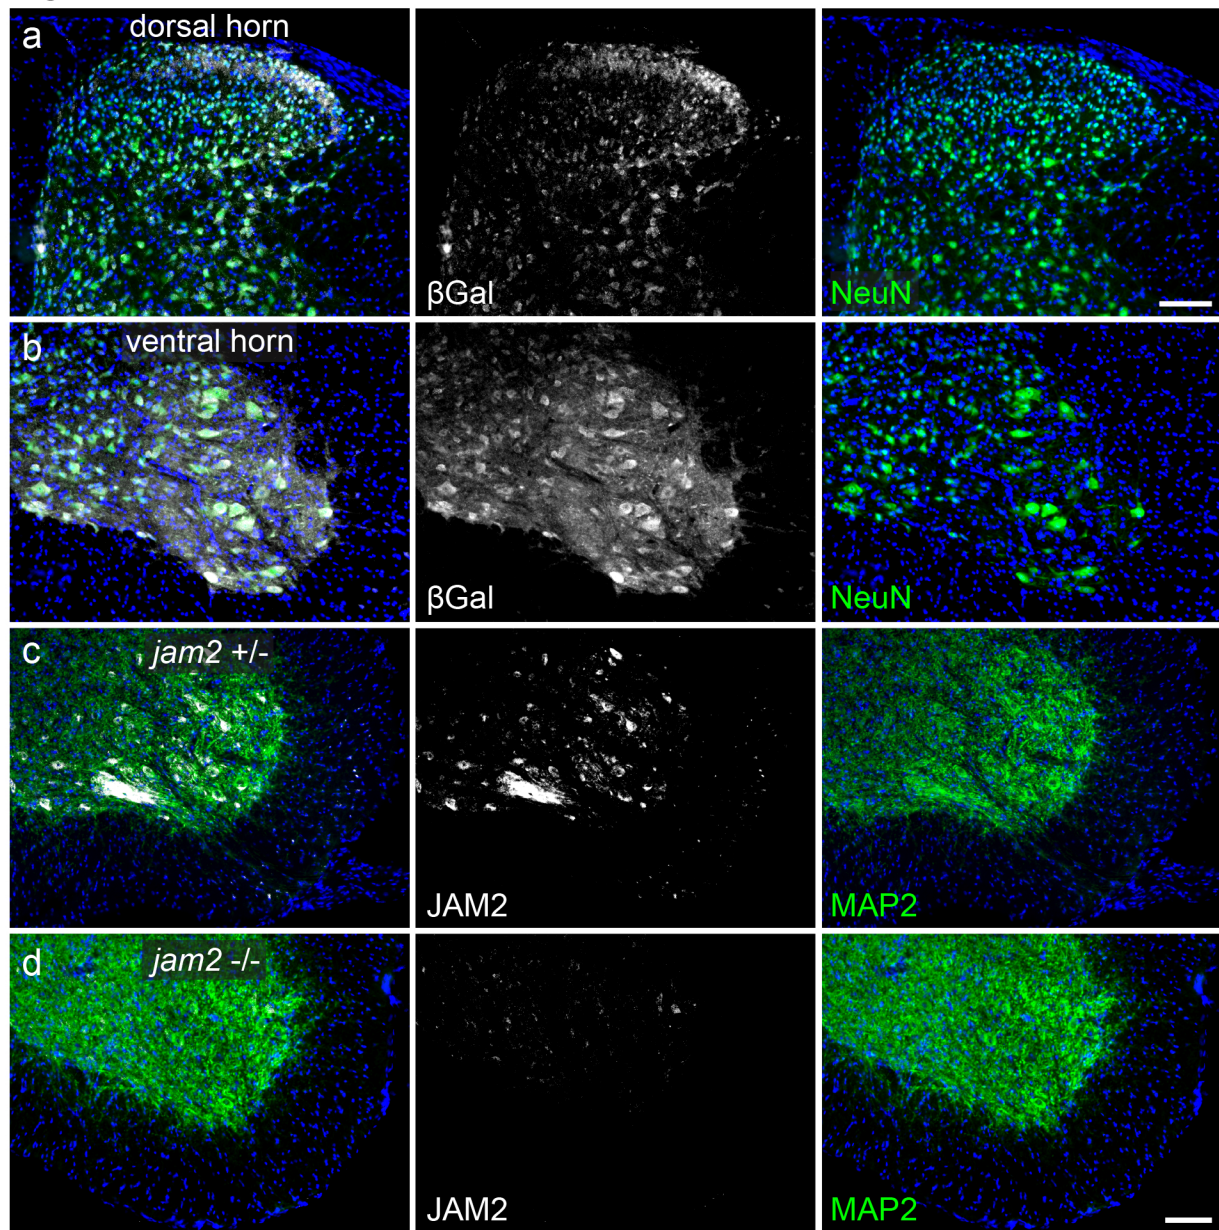



Figure S4

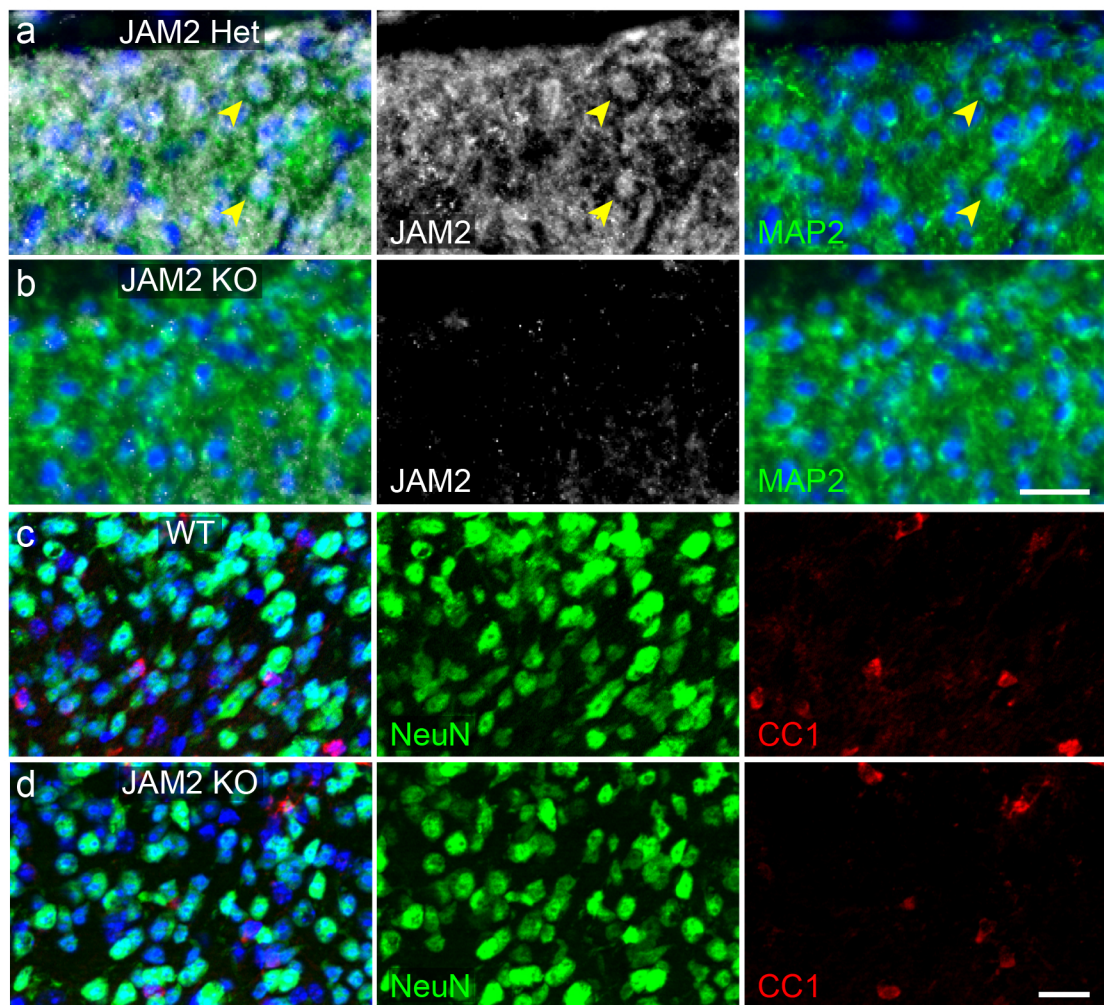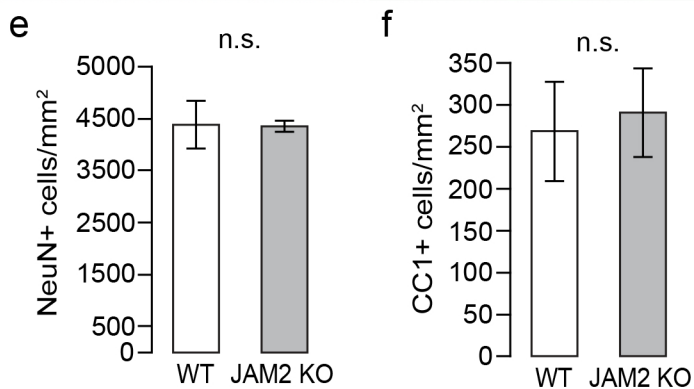

Figure S5

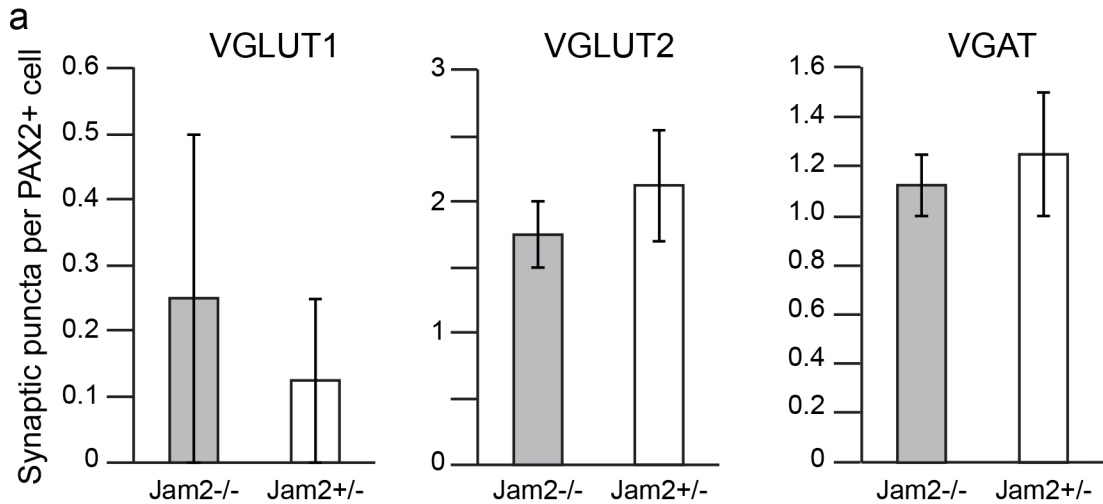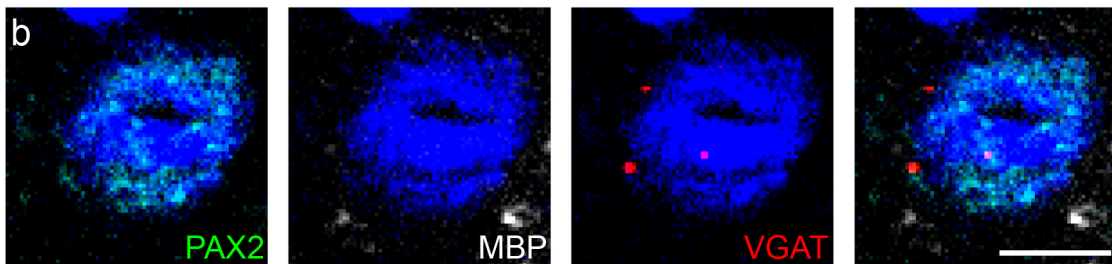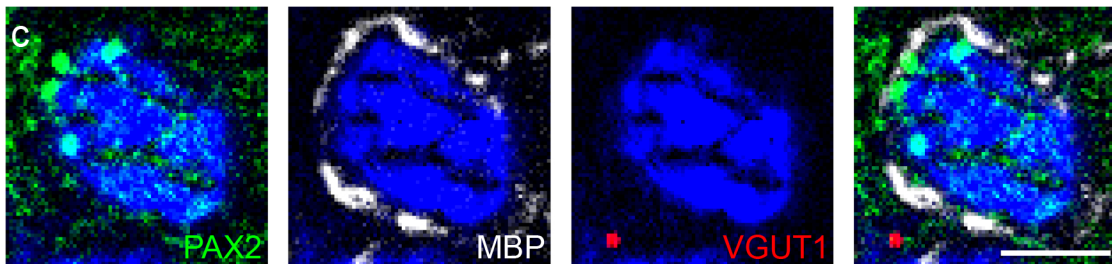

Supplement: NIHMS804662-supplement.pdf [file NIHMS804662-supplement.pdf]
